# Supplementary material for: Trim-Away ubiquitinates and degrades lysine-less and N-terminally acetylated substrates
Source: PubMed Central journal article supplement (PMC10105713; doi:10.1038/s41467-023-37504-x), 2023-04-15
Supplement: 41467_2023_37504_MOESM1_ESM.pdf [file 41467_2023_37504_MOESM1_ESM.pdf]

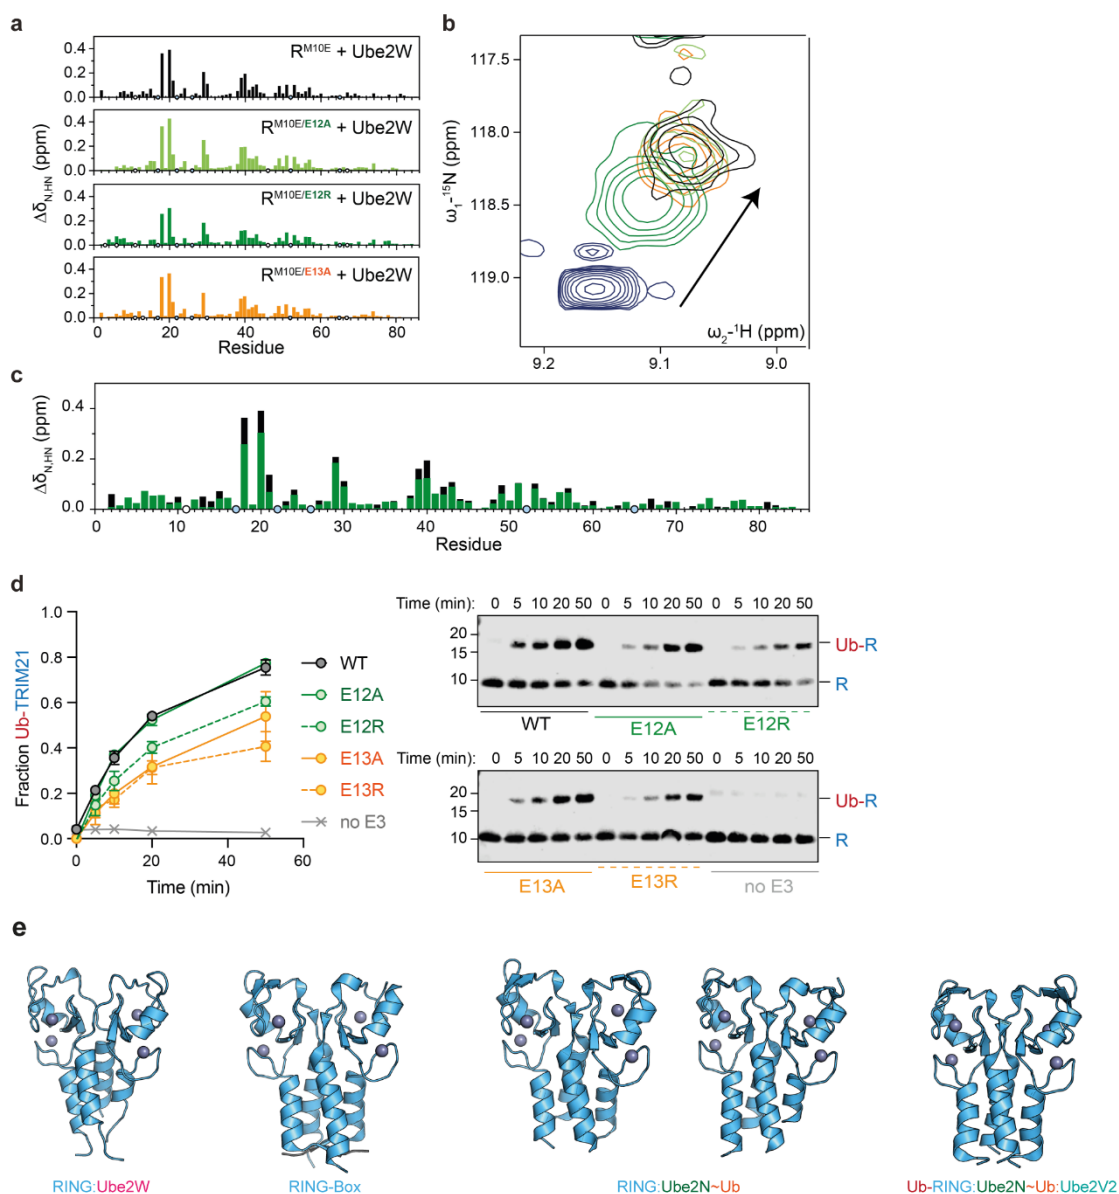

**Supplementary Fig. 1: Interaction of Ube2W with TRIM21 RING.** **a** Histograms of chemical shift perturbations (CSP) shown against the sequence of TRIM21 RING<sup>M10E</sup> (R<sup>M10E</sup>). These CSPs result from NMR titrations of Ube2W<sup>V30K/D67K/C91K</sup> against <sup>15</sup>N-labelled TRIM21 tri-ionic mutants at a 1:1 molar ratio. Blue circles indicate proline residues, white circles missing assignments. **b** A part of <sup>15</sup>N-HSQC spectral overlay of R<sup>M10E</sup> in absence (blue) or presence of 1:1 molar equivalent of Ube2W<sup>V30K/D67/C91K</sup>. In addition, spectra of TRIM21 mutants (E12A in light green, E12R in dark green and E13A in orange) are shown in presence of 1:1 molar equivalent of Ube2W<sup>V30K/D67/C91K</sup>. **c** Histograms shown in (A) are here shown as an overlay. **d** Ube2W-mediated TRIM21 RING monoubiquitination assay. Shown is a time-course, where error bars represent s.e.m. from n = 3 independent experiments. Western blots are representative of all replicates. **e** Shown are RING dimers of different TRIM21 complexes RING:Ube2W (8A58 [\[http://doi.org/10.2210/pdb8A58/pdb\]](http://doi.org/10.2210/pdb8A58/pdb)), RING-Box (50LM [\[http://doi.org/10.2210/pdb50LM/pdb\]](http://doi.org/10.2210/pdb50LM/pdb))<sup>14</sup>, RING:Ube2N~Ub (two RING dimers in asymmetric unit; 6S53 [\[http://doi.org/10.2210/pdb6S53/pdb\]](http://doi.org/10.2210/pdb6S53/pdb))<sup>30</sup>, Ub-RING:Ube2N~Ub:Ube2V2 (7BBD [\[http://doi.org/10.2210/pdb7BBD/pdb\]](http://doi.org/10.2210/pdb7BBD/pdb))<sup>38</sup>. Zn<sup>2+</sup>-atoms are shown as grey spheres, the isopeptide bond is marked by an arrow and polar interactions are indicated by dashed black lines.

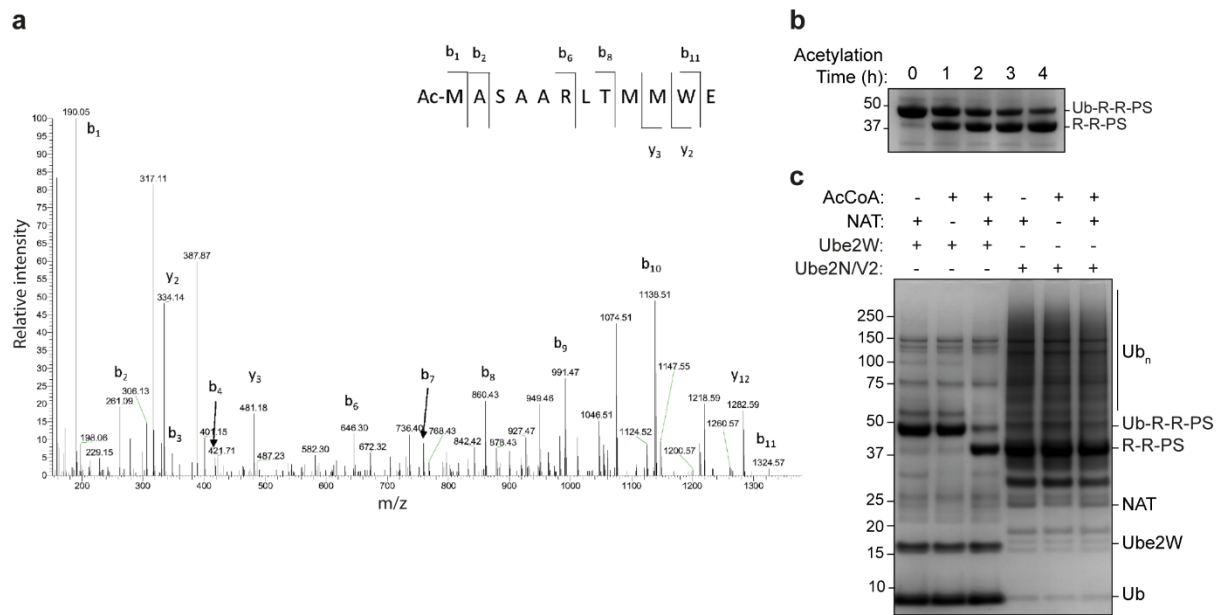

**Supplementary Fig. 2: N-terminal ubiquitination of TRIM21 RING.** **a** LC-MS/MS spectra of R-R-PS after 4 h acetylation reaction show N-terminally acetylated TRIM21 N-terminal peptides after digestion with the protease N-Asp. **b** Instant-Blue-stained gels showing Ube2W-mediated mono-ubiquitination of R-R-PS. Before the ubiquitination reaction, acetylation reactions were performed for the indicated times. Representative example from 2 independent experiments. **c** Ubiquitination reaction upon incubation with Ube2W or Ube2N/Ube2V2 for 1 h after 4 h of R-R-PS N-terminal acetylation. N-terminal acetylation does not impact ubiquitin smearing characteristic of free K63-chain formation. Representative example from 2 independent experiments.

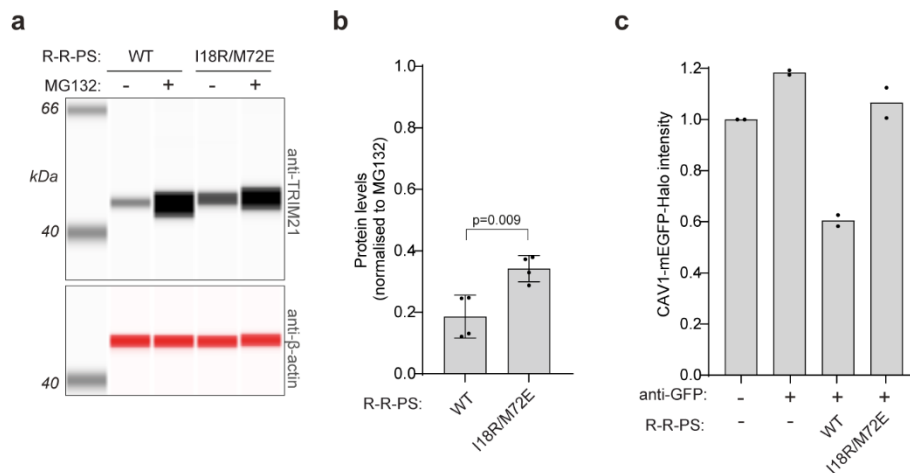

**Supplementary Fig. 3: RING-inactivating mutations affect ligase turnover and substrate degradation.** **a,b** R-R-PS proteins containing WT or I18R/M72E mutant RING domains were electroporated into RPE-1 TRIM21 KO cells  $\pm$  MG132 and whole cell lysates harvested 1 hour later for immunoblotting. Lane view (**a**) and quantification (**b**) of R-R-PS protein levels normalized to MG132 condition. **c** RPE-1 TRIM21 KO cells expressing CAV1-mEGFP-Halo were electroporated with PBS or anti-GFP antibody  $\pm$  the indicated R-R-PS proteins and fluorescence measured 3 hours later using the IncuCyte system. Graph shows mean and s.e.m. (**b**) or mean (**c**) from 4 (**b**) or 2 (**c**) independent experiments (black dots). Statistical significance based on two-tailed Student's *t*-test. Source data are provided as a Source Data file.

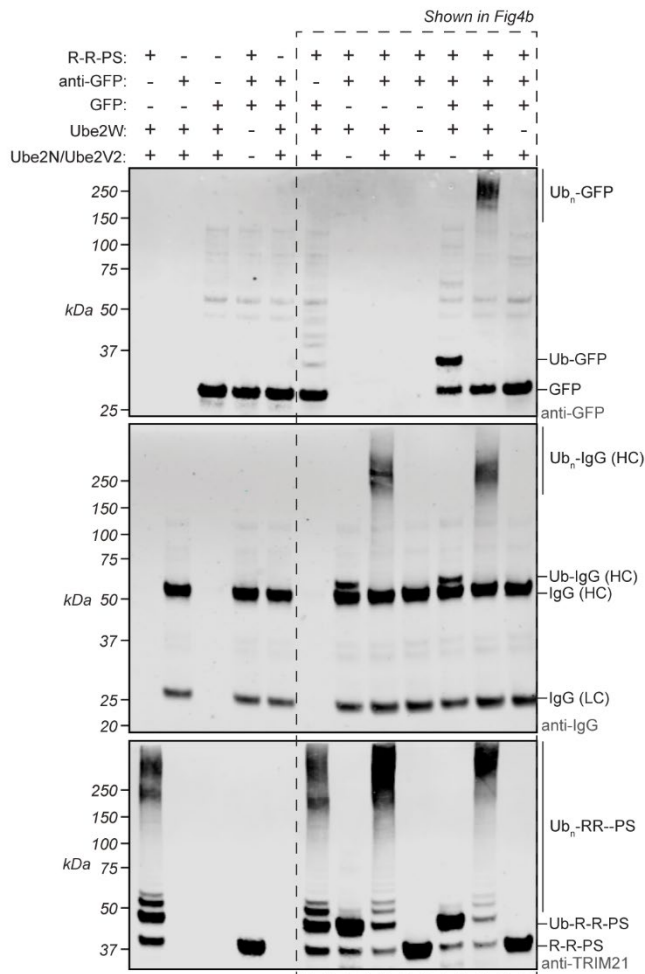

**Supplementary Fig. 4: TRIM21 independently ubiquitinates itself and substrate.** Western blots of in vitro ubiquitination reactions using combinations of R-R-PS, anti-GFP antibody, GFP, Ube2W and Ube2N/Ube2V2. Representative example from 2 independent experiments. Dashed line outlines region shown in Fig. 4b.

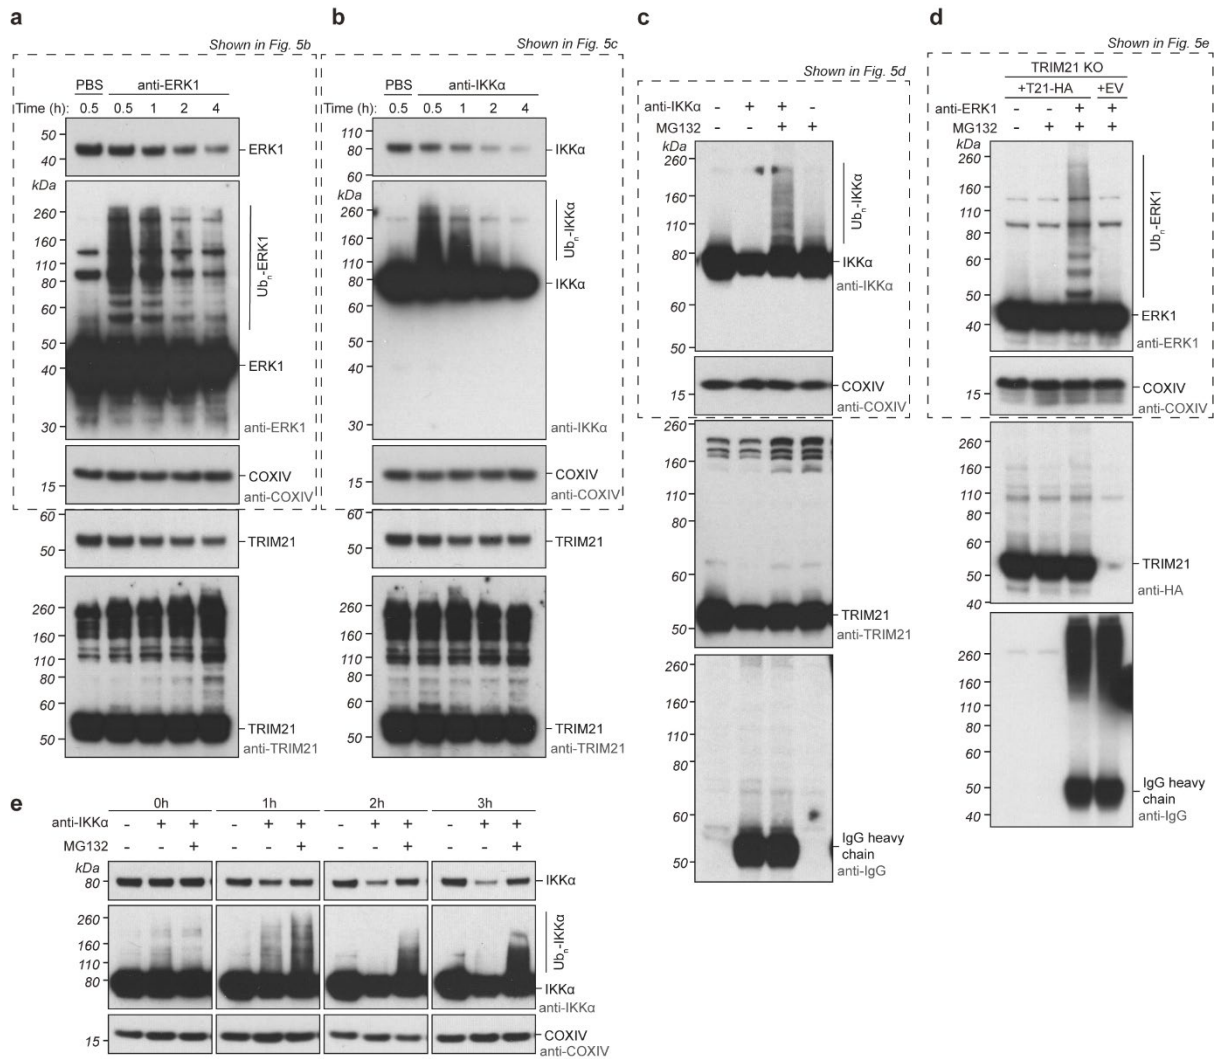

**Supplementary Fig. 5: Substrate ubiquitination during Trim-Away in live cells.** a-d Western blots of TRIM21 and antibody from Trim-Away experiments shown in Fig. 5b-e. Dashed lines outline regions shown in Fig. 5b-e. e Western blot of Trim-Away time-course experiment using anti- $\text{IKK}\alpha$  antibody in the presence or absence of MG132. Proteasome inhibition rescues  $\text{IKK}\alpha$  degradation and leads to the accumulation of ubiquitinated protein. Representative example from 2 independent experiments.

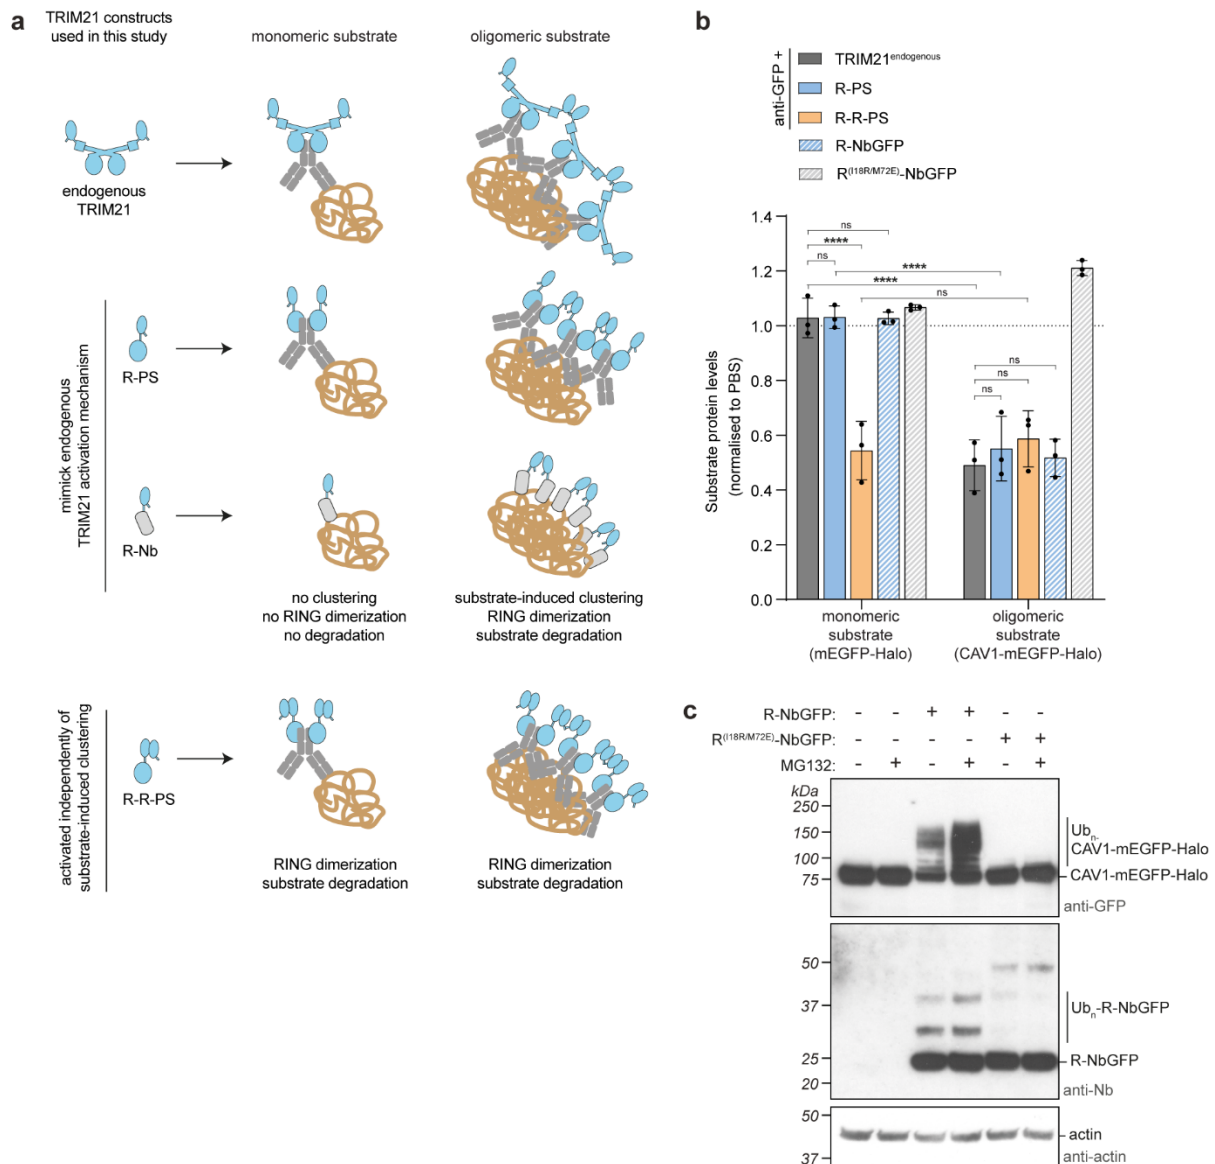

**Supplementary Fig. 6: RING-nanobody constructs mimic endogenous TRIM21.** **a** Schematic of TRIM21 constructs used in this study and respective requirements for substrate-induced clustering for activation. **b** Experimental validation of schematic shown in (a). RPE-1 cells expressing either monomeric (mEGFP-Halo) or oligomeric (CAV1-mEGFP-Halo) substrates were electroporated with anti-GFP antibody plus TRIM21 RING-PRYSPRY constructs (solid colours) or TRIM21 RING-NbGFP constructs alone (striped colours) and substrate fluorescence measured 6 hours later using the InCyte system. Graph shows mean and s.e.m. from  $n = 3$  independent experiments (black dots). Statistical significance based on two-way ANOVA and represented with ns (not significant,  $P > 0.05$ ), \*\*\* ( $P \leq 0.001$ ), \*\*\*\* ( $P \leq 0.0001$ ). **c** Western blot of Trim-Away experiment using WT R-NbGFP or a mutant incapable of catalysing ubiquitination ( $R^{I18R/M72E}$ -NbGFP). Representative example from 3 independent experiments. Source data are provided as a Source Data file.

## Supplementary Figure 7

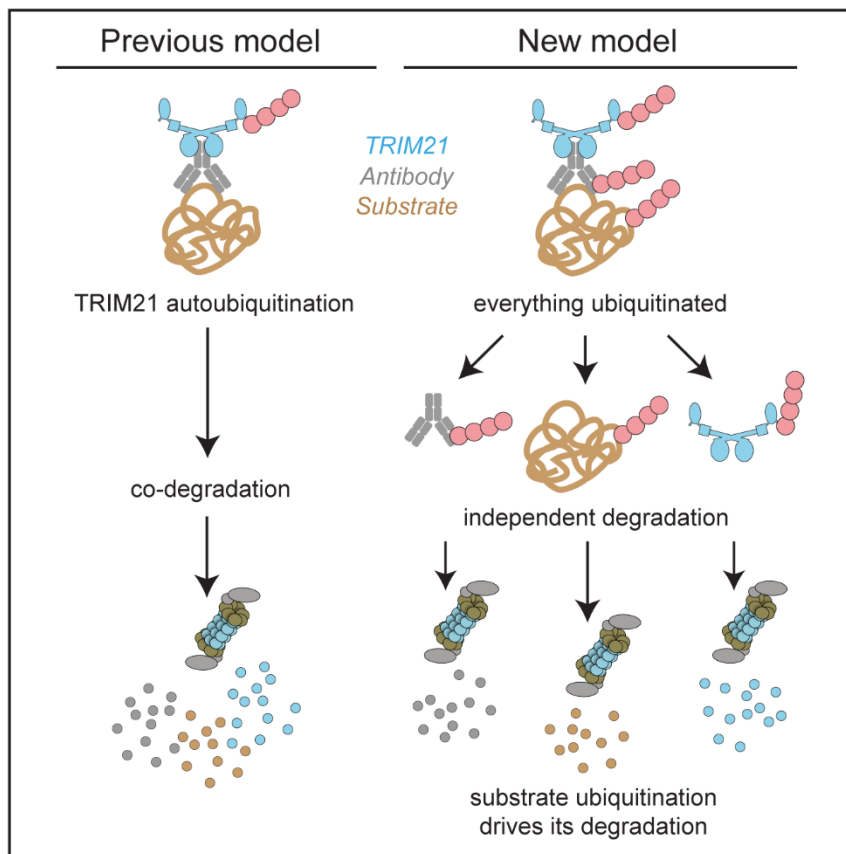

**Supplementary Fig. 7: New model for substrate degradation by Trim-Away.** See discussion for details.

| T21-R:Ube2W                                         |                        |
|-----------------------------------------------------|------------------------|
| <b>Data collection</b>                              |                        |
| Space group                                         | P121                   |
| Cell dimensions                                     |                        |
| <i>a, b, c</i> (Å)                                  | 62.82, 75.482, 63.835  |
| $\alpha, \beta, \gamma$ (°)                         | 90.0, 119.307, 90.0    |
| Resolution (Å)                                      | 29.46-2.25 (2.33-2.25) |
| <i>R</i> <sub>meas</sub>                            | 4.8 (65.9)             |
| CC <sub>1/2</sub> (%)                               | 99.9 (85.9)            |
| <i>I</i> / $\sigma$ <i>I</i>                        | 16.49 (2.01)           |
| Completeness (%)                                    | 95.5 (96.3)            |
| Redundancy                                          | 3.3 (3.6)              |
| <b>Refinement</b>                                   |                        |
| Resolution (Å)                                      | 29.46-2.25 (2.33-2.25) |
| No. reflections                                     | 23634 (2355)           |
| <i>R</i> <sub>work</sub> / <i>R</i> <sub>free</sub> | 0.22/0.26 (0.36/0.42)  |
| No. atoms                                           | 3515                   |
| Protein                                             | 3476                   |
| Ligand/ion                                          | 4                      |
| Water                                               | 35                     |
| <i>B</i> -factors                                   |                        |
| Protein                                             | 83.06                  |
| Ligand/ion                                          | 56.95                  |
| Water                                               | 78.61                  |
| R.m.s. deviations                                   |                        |
| Bond lengths (Å)                                    | 0.011                  |
| Bond angles (°)                                     | 1.41                   |

\*Values in parentheses are for highest-resolution shell.

**Supplementary Table 1: Crystal structure data collection and refinement statistics.** The TRIM21 RING:Ube2W crystal structure with model and structure factors have been deposited at the PDB with the accession code 8A58 [<http://doi.org/10.2210/pdb8A58/pdb>]. Statistics for both data integration and model refinement are given.



**SOURCE DATA**

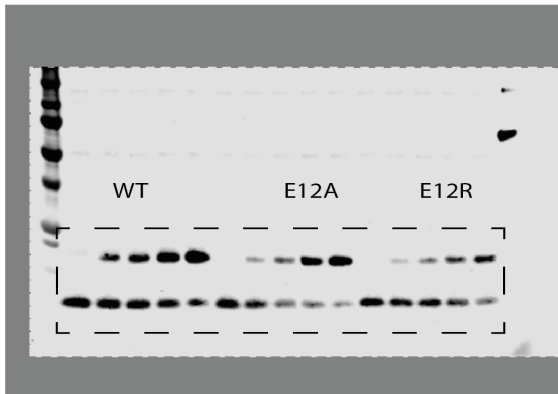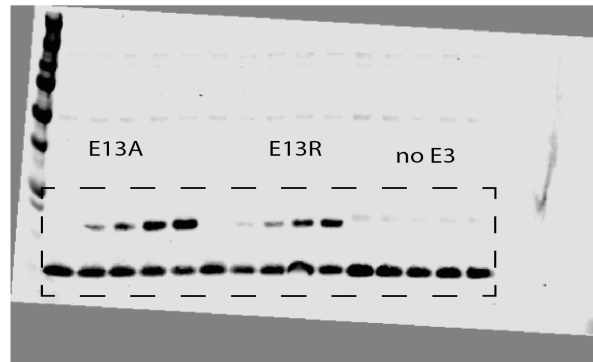

**Uncropped blots from Supplementary Fig. 1d**

**b**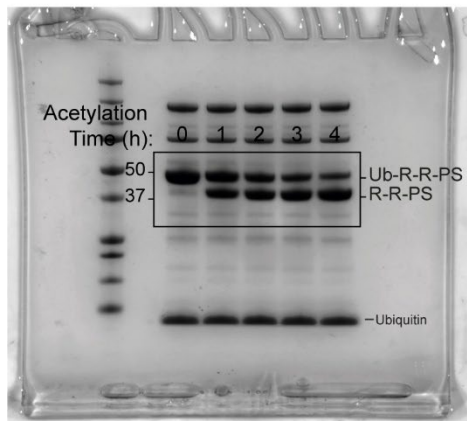**c**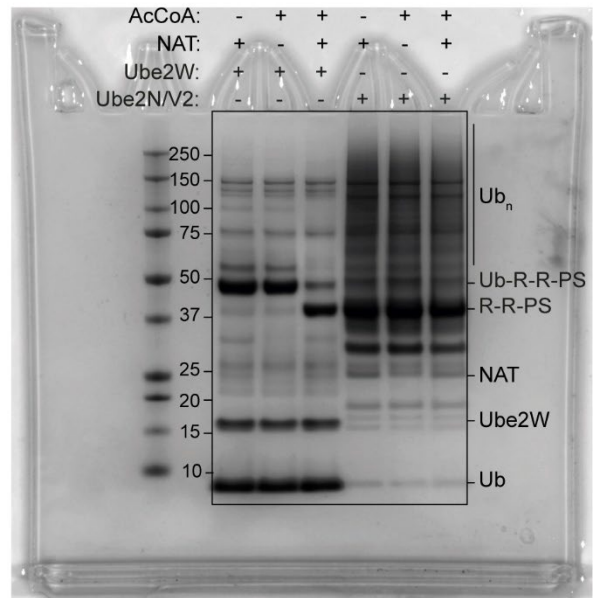

Uncropped gels from Supplementary Fig. 2b,c

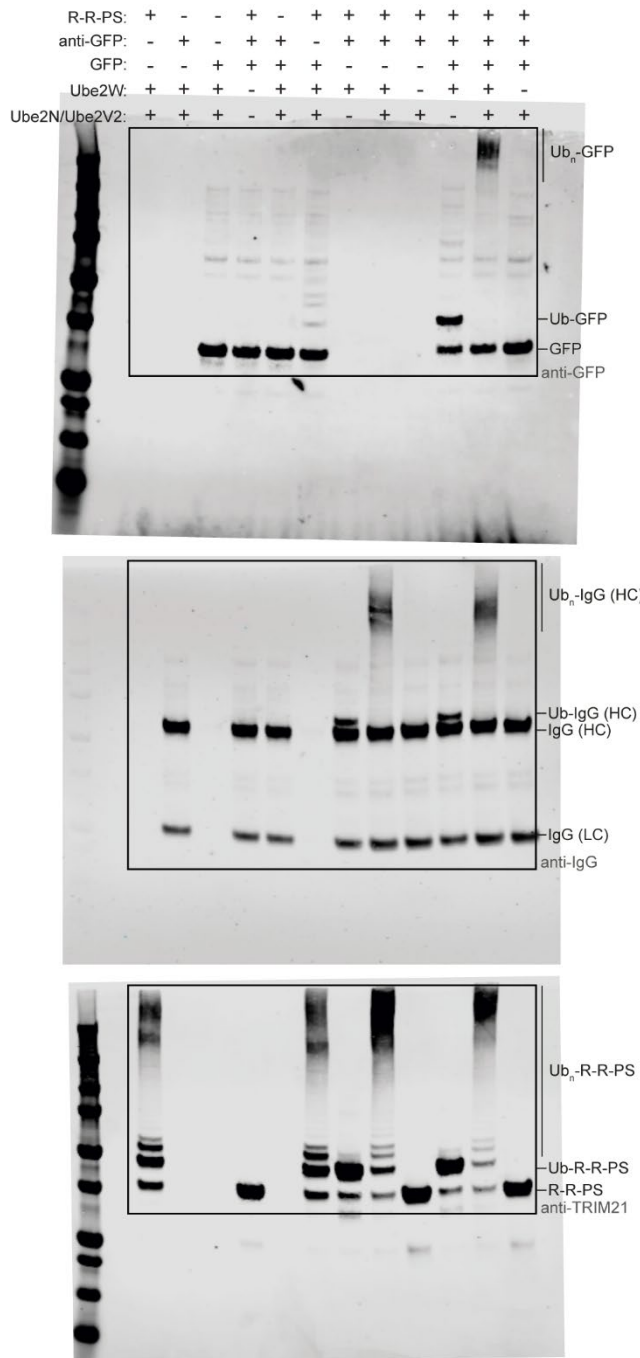

Uncropped blots from Supplementary Fig. 4

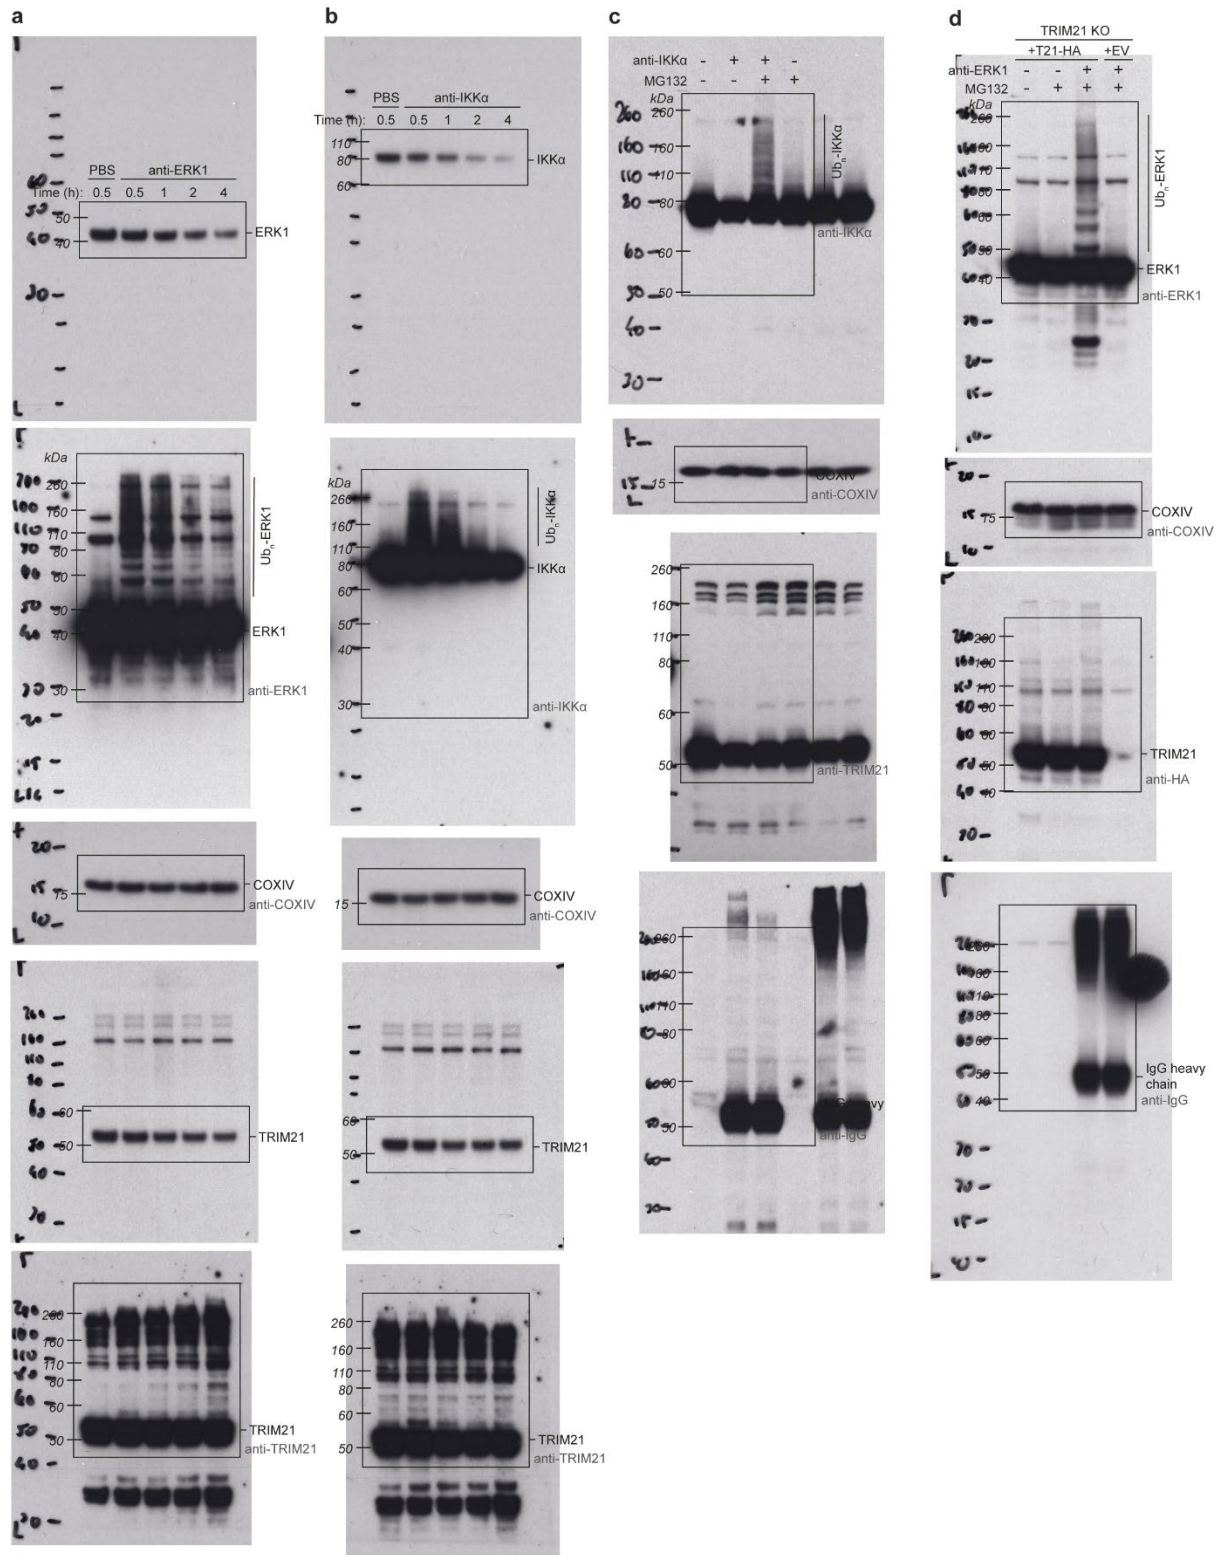

Uncropped blots from Supplementary Fig. 5a-d

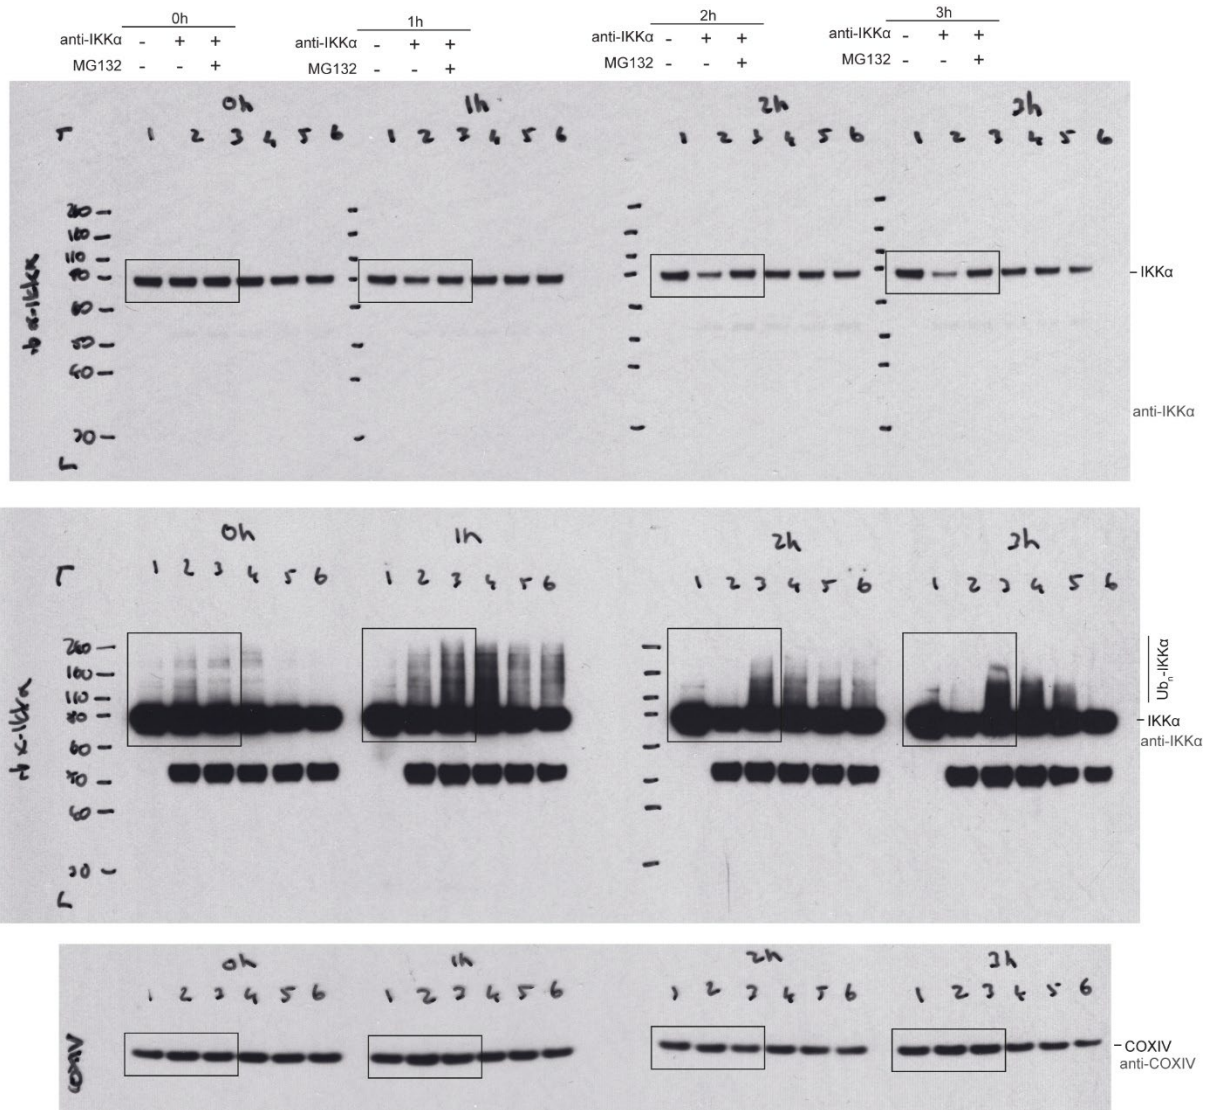

Uncropped blots from Supplementary Fig. 5e

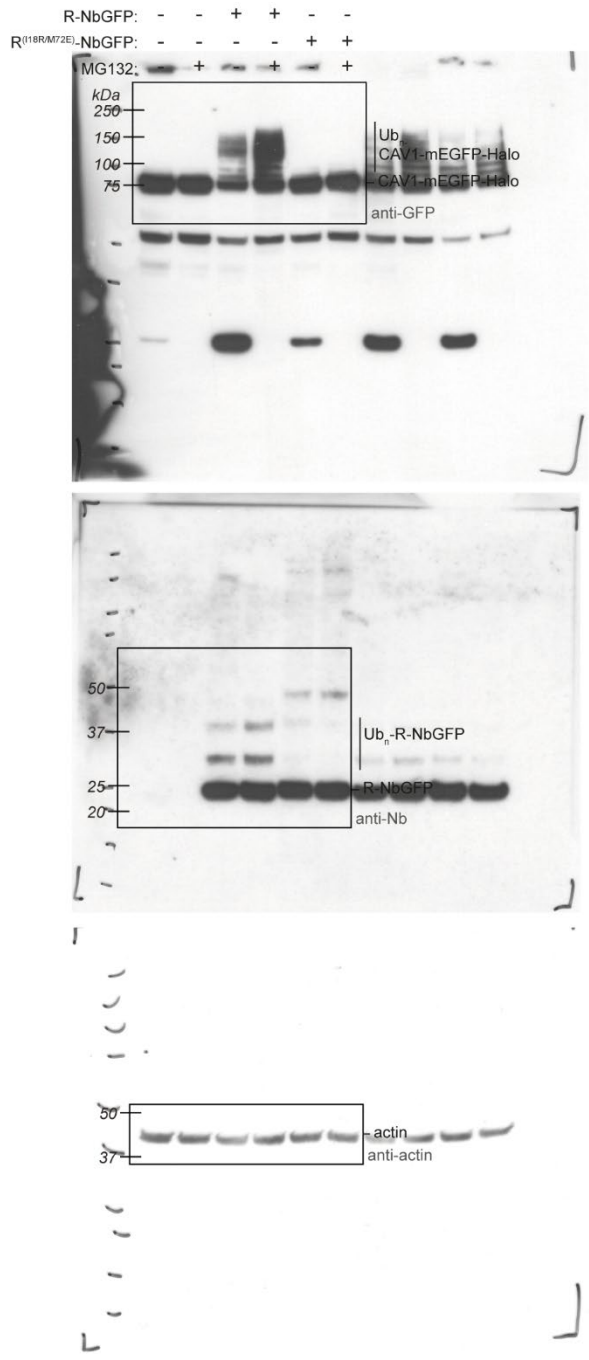

Uncropped blots from Supplementary Fig. 6c
