# Supplementary material for: Trim-Away ubiquitinates and degrades lysine-less and N-terminally acetylated substrates
Source: PubMed Central journal article supplement (PMC10105713; doi:10.1038/s41467-023-37504-x), 2023-04-15
Supplement: 41467_2023_37504_MOESM4_ESM.pdf [file 41467_2023_37504_MOESM4_ESM.pdf]

## Reporting Summary

Nature Portfolio wishes to improve the reproducibility of the work that we publish. This form provides structure for consistency and transparency in reporting. For further information on Nature Portfolio policies, see our [Editorial Policies](#) and the [Editorial Policy Checklist](#).

### Statistics

For all statistical analyses, confirm that the following items are present in the figure legend, table legend, main text, or Methods section.

- |                                     |                                                                                                                                                                                                                                                                                                |
|-------------------------------------|------------------------------------------------------------------------------------------------------------------------------------------------------------------------------------------------------------------------------------------------------------------------------------------------|
| n/a                                 | Confirmed                                                                                                                                                                                                                                                                                      |
| <input type="checkbox"/>            | <input checked="" type="checkbox"/> The exact sample size ( $n$ ) for each experimental group/condition, given as a discrete number and unit of measurement                                                                                                                                    |
| <input type="checkbox"/>            | <input checked="" type="checkbox"/> A statement on whether measurements were taken from distinct samples or whether the same sample was measured repeatedly                                                                                                                                    |
| <input type="checkbox"/>            | <input checked="" type="checkbox"/> The statistical test(s) used AND whether they are one- or two-sided<br><i>Only common tests should be described solely by name; describe more complex techniques in the Methods section.</i>                                                               |
| <input checked="" type="checkbox"/> | <input type="checkbox"/> A description of all covariates tested                                                                                                                                                                                                                                |
| <input type="checkbox"/>            | <input checked="" type="checkbox"/> A description of any assumptions or corrections, such as tests of normality and adjustment for multiple comparisons                                                                                                                                        |
| <input type="checkbox"/>            | <input checked="" type="checkbox"/> A full description of the statistical parameters including central tendency (e.g. means) or other basic estimates (e.g. regression coefficient) AND variation (e.g. standard deviation) or associated estimates of uncertainty (e.g. confidence intervals) |
| <input type="checkbox"/>            | <input checked="" type="checkbox"/> For null hypothesis testing, the test statistic (e.g. $F$ , $t$ , $r$ ) with confidence intervals, effect sizes, degrees of freedom and $P$ value noted<br><i>Give <math>P</math> values as exact values whenever suitable.</i>                            |
| <input checked="" type="checkbox"/> | <input type="checkbox"/> For Bayesian analysis, information on the choice of priors and Markov chain Monte Carlo settings                                                                                                                                                                      |
| <input checked="" type="checkbox"/> | <input type="checkbox"/> For hierarchical and complex designs, identification of the appropriate level for tests and full reporting of outcomes                                                                                                                                                |
| <input checked="" type="checkbox"/> | <input type="checkbox"/> Estimates of effect sizes (e.g. Cohen's $d$ , Pearson's $r$ ), indicating how they were calculated                                                                                                                                                                    |

*Our web collection on [statistics for biologists](#) contains articles on many of the points above.*

### Software and code

Policy information about [availability of computer code](#)

Data collection Cryslographic data collection was performed using the setup provided by the European Synchrotron Radiation Facility at beamline ID23

Data analysis  
 Microsoft Excel (version office 2019)  
 GraphPad Prism (version 9.5.1)  
 IncuCyte Software, Sartorius (version 2021C)  
 Compass software for simple western, Bio-Techne (version 5.0.1)  
 Fiji/ImageJ (version 2.3.0/1.54c)  
 PyMOL (version 1.8.2.3)  
 Coot (versions 0.8.9 and 0.9)  
 XDS (version 31 January 2019)  
 Refmac5 (version 5.5)  
 Phenix-Refine (version 1.18.2-3874)  
 Phaser (version 2.8)

For manuscripts utilizing custom algorithms or software that are central to the research but not yet described in published literature, software must be made available to editors and reviewers. We strongly encourage code deposition in a community repository (e.g. GitHub). See the Nature Portfolio [guidelines for submitting code & software](#) for further information.

## Data

Policy information about [availability of data](#)

All manuscripts must include a [data availability statement](#). This statement should provide the following information, where applicable:

- Accession codes, unique identifiers, or web links for publicly available datasets
- A description of any restrictions on data availability
- For clinical datasets or third party data, please ensure that the statement adheres to our [policy](#)

Source data are provided within this paper. The crystal structure with model and structure factors have been deposited at the PDB with the accession code 8A58 (10.2210/pdb8A58/pdb). All other data are available from the corresponding authors on reasonable request.

## Human research participants

Policy information about [studies involving human research participants and Sex and Gender in Research](#).

|                             |      |
|-----------------------------|------|
| Reporting on sex and gender | n.a. |
| Population characteristics  | n.a. |
| Recruitment                 | n.a. |
| Ethics oversight            | n.a. |

Note that full information on the approval of the study protocol must also be provided in the manuscript.

## Field-specific reporting

Please select the one below that is the best fit for your research. If you are not sure, read the appropriate sections before making your selection.

- Life sciences       Behavioural & social sciences       Ecological, evolutionary & environmental sciences

For a reference copy of the document with all sections, see [nature.com/documents/nr-reporting-summary-flat.pdf](https://www.nature.com/documents/nr-reporting-summary-flat.pdf)

## Life sciences study design

All studies must disclose on these points even when the disclosure is negative.

|                 |                                                                                                           |
|-----------------|-----------------------------------------------------------------------------------------------------------|
| Sample size     | Sample size taken as number of repeats of each experiment and always more than or equal to n=2.           |
| Data exclusions | No data were excluded from any analysis                                                                   |
| Replication     | All experiments were independently replicated at least twice. All attempts at replication were successful |
| Randomization   | n.a.                                                                                                      |
| Blinding        | n.a.                                                                                                      |

## Reporting for specific materials, systems and methods

We require information from authors about some types of materials, experimental systems and methods used in many studies. Here, indicate whether each material, system or method listed is relevant to your study. If you are not sure if a list item applies to your research, read the appropriate section before selecting a response.

## Materials &amp; experimental systems

| n/a                                 | Involvement                         | Category                      |
|-------------------------------------|-------------------------------------|-------------------------------|
| <input type="checkbox"/>            | <input checked="" type="checkbox"/> | Antibodies                    |
| <input type="checkbox"/>            | <input checked="" type="checkbox"/> | Eukaryotic cell lines         |
| <input checked="" type="checkbox"/> | <input type="checkbox"/>            | Palaeontology and archaeology |
| <input checked="" type="checkbox"/> | <input type="checkbox"/>            | Animals and other organisms   |
| <input checked="" type="checkbox"/> | <input type="checkbox"/>            | Clinical data                 |
| <input checked="" type="checkbox"/> | <input type="checkbox"/>            | Dual use research of concern  |

## Methods

| n/a                                 | Involvement              | Category               |
|-------------------------------------|--------------------------|------------------------|
| <input checked="" type="checkbox"/> | <input type="checkbox"/> | ChIP-seq               |
| <input checked="" type="checkbox"/> | <input type="checkbox"/> | Flow cytometry         |
| <input checked="" type="checkbox"/> | <input type="checkbox"/> | MRI-based neuroimaging |

## Antibodies

## Antibodies used

humanised anti-hexon IgG1 9C12  
 humanised anti-hexon IgG1 9C12H433A  
 mouse anti-GFP clone 9F9.F9  
 mouse anti-GFP (clones 7.1 and 13.1)  
 NbALFA-mIgG1-Fc  
 NbALFA-HRP  
 rabbit anti-ERK1 clone Y72  
 rabbit anti-IKK $\alpha$  clone Y463  
 rabbit anti-TRIM21 clone D1O1D  
 mouse anti-TRIM21 clone D-12  
 rabbit anti-vhh  
 rat anti-HA clone 3F10 HRP-conjugated  
 rabbit anti-Vinculin clone EPR8185  
 rabbit anti-COXIV  
 rabbit anti-Hsp60  
 Rabbit anti-Mouse IgG HRP-conjugated  
 Goat anti-Mouse light chain specific, HRP-conjugated  
 Goat anti-Mouse IgG, IRDye 800CW  
 Goat anti-Rabbit IgG HRP-conjugated  
 Mouse anti-Rabbit light chain specific, HRP-conjugated  
 Goat anti-Rabbit IgG, IRDye 680RD

## Validation

Each antibody has been validated by the vendor:

<https://doi.org/10.4049/jimmunol.1502601>  
<https://doi.org/10.4049/jimmunol.1502601>  
[http://antibodyregistry.org/AB\\_218216](http://antibodyregistry.org/AB_218216)  
[http://antibodyregistry.org/AB\\_390913](http://antibodyregistry.org/AB_390913)  
 NanoTag; N1582  
 NanoTag; N1501-HRP  
[http://antibodyregistry.org/AB\\_732202](http://antibodyregistry.org/AB_732202)  
[http://antibodyregistry.org/AB\\_733070](http://antibodyregistry.org/AB_733070)  
[http://antibodyregistry.org/AB\\_2800177](http://antibodyregistry.org/AB_2800177)  
[http://antibodyregistry.org/AB\\_628286](http://antibodyregistry.org/AB_628286)  
[http://antibodyregistry.org/AB\\_2734123](http://antibodyregistry.org/AB_2734123)  
[http://antibodyregistry.org/AB\\_390917](http://antibodyregistry.org/AB_390917)  
[http://antibodyregistry.org/AB\\_11144129](http://antibodyregistry.org/AB_11144129)  
[http://antibodyregistry.org/AB\\_2783000](http://antibodyregistry.org/AB_2783000)  
[http://antibodyregistry.org/AB\\_2118931](http://antibodyregistry.org/AB_2118931)  
[http://antibodyregistry.org/AB\\_2636929](http://antibodyregistry.org/AB_2636929)  
[http://antibodyregistry.org/AB\\_805324](http://antibodyregistry.org/AB_805324)  
[http://antibodyregistry.org/AB\\_2687825](http://antibodyregistry.org/AB_2687825)  
[http://antibodyregistry.org/AB\\_228338](http://antibodyregistry.org/AB_228338)  
[http://antibodyregistry.org/AB\\_827270](http://antibodyregistry.org/AB_827270)  
[http://antibodyregistry.org/AB\\_2721181](http://antibodyregistry.org/AB_2721181)

## Eukaryotic cell lines

Policy information about [cell lines and Sex and Gender in Research](#)

## Cell line source(s)

HEK293T (ATCC; CRL-3216)  
 HEK293T TRIM21 KO (<https://doi.org/10.7554/eLife.32660>)

hTERT-RPE-1 (ATCC; CRL-4000)  
 hTERT-RPE-1 TRIM21 KO (<https://doi.org/10.1038/s41594-021-00560-2>)  
 hTERT-RPE-1 TRIM21 KO TRIM21-HA (This paper)  
 hTERT-RPE-1 CAV1-mEGFP (This paper)  
 hTERT-RPE-1 CAV1-mEGFP-Halo (This paper)  
 hTERT-RPE-1 mEGFP-Halo (This paper)  
 hTERT-RPE-1 TRIM21 KO CAV1-mEGFP-Halo (This paper)  
 NIH3T3-CAV1-EGFP (<https://doi.org/10.1038/ncomms7867>)

## Authentication

HEK293T (ATCC; CRL-3216) - Authentication: Morphology  
 HEK293T TRIM21 KO (<https://doi.org/10.7554/eLife.32660>) - Authentication: Morphology, TRIM21 western blot  
 hTERT-RPE-1 (ATCC; CRL-4000) - Authentication: Morphology  
 hTERT-RPE-1 TRIM21 KO (<https://doi.org/10.1038/s41594-021-00560-2>) - Authentication: Morphology, TRIM21 western blot  
 hTERT-RPE-1 TRIM21 KO TRIM21-HA (This paper) - Authentication: Morphology, TRIM21 western blot  
 hTERT-RPE-1 CAV1-mEGFP (This paper) - Authentication: Morphology, fluorescence microscopy, GFP western blot  
 hTERT-RPE-1 CAV1-mEGFP-Halo (This paper) - Authentication: Morphology, fluorescence microscopy, GFP western blot  
 hTERT-RPE-1 mEGFP-Halo (This paper) - Authentication: Morphology, fluorescence microscopy, GFP western blot  
 hTERT-RPE-1 TRIM21 KO CAV1-mEGFP-Halo (This paper) - Authentication: Morphology, fluorescence microscopy, TRIM21 and GFP western blot  
 NIH3T3-CAV1-EGFP (<https://doi.org/10.1038/ncomms7867>) - Authentication: Morphology, fluorescence microscopy, GFP western blot

## Mycoplasma contamination

All cell lines were routinely screened and determined to be mycoplasma-free

Commonly misidentified lines  
(See [ICLAC](#) register)

No commonly misidentified cell lines were used in this study
